# Supplementary material
Source: PubMed Central journal article supplement (PMC5693759)
Supplement: NIHMS900499-supplement-335_2017_9704_MOESM6_ESM.pdf [file NIHMS900499-supplement-335_2017_9704_MOESM6_ESM.pdf]

Supplementary Table 1. A list of the Montpellier strains

LEGEND: order=arbitrary order; Strain=strain name; Genus=genus name; Species=species name; Country=country from which strain was originally collected; Established=year that strain was established in laboratory; Genotyped\_MDA=was strain genotyped with Mouse Diversity Array; Karyotype=standard (std, 2N=30) or alternative 2N; Exome\_sequencing\_current\_study=whether strain was included in present study.

| order | Strain | Genus    | Species     | subspecies   | Country       | Locality       | Established | N_generation | Genotyped_MDA | Can_cross_to | Karyotype | Exome_sequencing_current_study |
|-------|--------|----------|-------------|--------------|---------------|----------------|-------------|--------------|---------------|--------------|-----------|--------------------------------|
| 1     | MAM    | Mus      | musculus    | musculus     | Armenia       | Megri          | 1989        | 28           |               |              | std       | yes                            |
| 2     | MBK    | Mus      | musculus    | musculus     | Bulgaria      | Kranevo        | 1984        | 47           | yes           |              | std       |                                |
| 3     | MBS    | Mus      | musculus    | musculus     | Bulgaria      | Sokolovo       | 1984        | 45           | yes           |              | std       | yes                            |
| 4     | MBT    | Mus      | musculus    | musculus     | Bulgaria      | General Toshe  | 1980        | 62           |               |              | std       |                                |
| 5     | MDH    | Mus      | musculus    | musculus     | Danemark      | Hov            | 1988        | 32           | yes           |              | std       |                                |
| 6     | MGA    | Mus      | musculus    | musculus     | Georgia       | Alazani        | 1991        | 29           | yes           |              | std       | yes                            |
| 7     | MPB    | Mus      | musculus    | musculus     | Poland        | Bialowieza     | 1990        | 30           | yes           |              | std       | yes                            |
| 8     | 22MO   | Mus      | musculus    | domesticus   | Tunisia       | Monastir       | 1982        | 48           | yes           |              | 22 chr    | yes                            |
| 9     | BIK/g  | Mus      | musculus    | domesticus   | Israel        | Kefar Galim    | 1982        | 58           | yes           |              | std       | yes                            |
| 10    | BZO    | Mus      | musculus    | domesticus   | Algeria       | Oran           | 1981        | 51           | yes           |              | std       | yes                            |
| 11    | DCA    | Mus      | musculus    | domesticus   | Cyprus        | Akrotiri       | 2005        | 8            | yes           |              | std       | yes                            |
| 12    | DCP    | Mus      | musculus    | domesticus   | Cyprus        | Paphos         | 2005        | 9            | yes           |              | std       | yes                            |
| 13    | DDO    | Mus      | musculus    | domesticus   | Denmark       | Ödis           | 1985        | 40           | yes           |              |           | 34 yes                         |
| 14    | DEB    | Mus      | musculus    | domesticus   | Spain         | Barcelone      | 1997        | 22           | yes           |              | std       | yes                            |
| 15    | DGA    | Mus      | musculus    | domesticus   | Georgia       | Adjaria        | 1991        | 29           | yes           |              | std       | yes                            |
| 16    | DIK    | Mus      | musculus    | domesticus   | Israel        | Keshet         | 2000        | 18           | yes           |              | std       | yes                            |
| 17    | DJO    | Mus      | musculus    | domesticus   | Italia        | Orcetto        | 1984        | 41           | yes           |              |           | 38 yes                         |
| 18    | DMZ    | Mus      | musculus    | domesticus   | Morocco       | Azemmour       | 1989        | 32           | yes           |              | std       | yes                            |
| 19    | DOT    | Mus      | musculus    | domesticus   | French Polyne | Tahiti         | 1983        | 46           | yes           |              | std       | yes                            |
| 20    | WLA    | Mus      | musculus    | domesticus   | France        | Toulouse       | 1990        | 60           | yes           |              | std       | yes                            |
| 21    | WMP    | Mus      | musculus    | domesticus   | Tunisia       | Monastir       | 1982        | 60           | yes           |              |           | 22 yes                         |
| 22    | BID    | Mus      | musculus    | musculus_spp | Iran          | Birdjand       | 1992        | 27           |               |              | std       | yes                            |
| 23    | KAK    | Mus      | musculus    | musculus_spp | Iran          | Khakhk         | 1992        | 26           |               |              | std       | yes                            |
| 24    | MPR    | Mus      | musculus    | musculus_spp | Pakistan      | Rawalpindi     | 1990        | 31           |               |              | std       | yes                            |
| 25    | TEH    | Mus      | musculus    | musculus_spp | Iran          | Tehran         | 1990        | 27           |               |              | std       | yes                            |
| 26    | CIM    | Mus      | musculus    | castaneus    | India         | Masinagudi     | 1991        | 26           | yes           |              | std       | yes                            |
| 27    | CKN    | Mus      | musculus    | castaneus    | Kenya         | Nairobi        | 2002        | 12           | yes           |              | std       |                                |
| 28    | CKS    | Mus      | musculus    | castaneus    | Kenya         | Mombasa        | 2002        | 14           | yes           |              | std       |                                |
| 29    | DKN    | Mus      | musculus    | castaneus    | Kenya         | Nairobi        | 2002        | 14           | yes           |              | std       |                                |
| 30    | MDG    | Mus      | musculus    | castaneus    | Madagascar    | Manakasina     | 2000        | 17           | yes           |              | std       |                                |
| 31    | SEB    | Mus      | spretus     |              | Spain         | Barcelona      | 1997        | 21           | pend          | +            | std       |                                |
| 32    | SEG    | Mus      | spretus     |              | Spain         | Granada        | 1978        | 59           | pend          | +            | std       | yes                            |
| 33    | SFM    | Mus      | spretus     |              | France        | Montpellier    | 1982        | 46           | pend          | +            | std       | yes                            |
| 34    | SMZ    | Mus      | spretus     |              | Maroc         | Azemmour       | 1989        | 32           | pend          | +            | std       |                                |
| 35    | STF    | Mus      | spretus     |              | Tunisia       | Fondouk Djedi  | 1984        | 60           | pend          | +            | std       | yes                            |
| 36    | ZRU    | Mus      | spicilegus  |              | Ukraine       | Kalomoyevka    | 1982        | 29           | pend          | +            | std       |                                |
| 37    | XBS    | Mus      | macedonicus |              | Bulgaria      | Slantchev Bria | 1984        | 37           | pend          | +            | std       |                                |
| 38    | KTK    | Mus      | caroli      |              | Thailand      | Khorat         | 1999        | 20           |               | artif insem  | std       |                                |
| 39    | PAH    | Coelomys | pahari      |              | Thailand      | Tak            | 1977        | 50           |               |              | std       |                                |
