# Supplementary material
Source: PubMed Central journal article supplement (PMC5693759)
Supplement: NIHMS900499-supplement-335_2017_9704_MOESM7_ESM.pdf [file NIHMS900499-supplement-335_2017_9704_MOESM7_ESM.pdf]

## List of publications having used WDIS strains from the Montpellier repository in the last 20 years

1. Sage J, Yuan L, Martin L, Mattei M-G, Guénet J-L, Liu J-G, Hoog C, Rassoulzadegan M, Cuzin F. (1997) The Sycp1 Loci of the Mouse Genome: Successive Retropositions of a Meiotic Gene during the Recent Evolution of the Genus. *Genomics* 44:118-126.
2. Alibert P, Fel-Clair F, Manolakou K, Britton-Davidian J, Auffray JC. (1997) Developmental stability, fitness, and trait size in laboratory hybrids between European subspecies of the house mouse. *Evolution* 51:1284-1295.
3. Lenormand T, Fel-Clair F, Manolakou K, Alibert P, Britton-Davidian J. (1997) Chromosomal transmission bias in laboratory hybrids between wild strains of the two European subspecies of house mice. *Genetics* 147:1279-1287.
4. Hwang J, Hofstetter J, Bonhomme F, Karn R. (1997) The microevolution of mouse salivary androgen-binding protein (ABP) paralleled subspeciation of *Mus musculus*. *Heredity* 88: 93-97.
5. Qi C-F, Bonhomme F, Buckler-White A, Buckler C, Orth A, Lander MR, Chattopadhyay SK, Morse HC III. (1998) Molecular phylogeny of *Fv1*. *Mamm Genome* 9:1049-1055.
6. Gouat P, Patris B, Lalande C. (1998) Conspecific and heterospecific behavioural discrimination of individual odours by mound-building mice. *C R Acad Sci III* 321(7):571-5.
7. Christophe N, Baudoin C. (1998) Olfactory preferences in two strains of wild mice, *Mus musculus musculus* and *Mus musculus domesticus*, and their hybrids. *Animal Behaviour* 56:365-369.
8. Bishop TR, Miller MW, Wang A, Dierks PM. (1998) Multiple copies of the ALA-D gene are located at the Lv locus in *Mus domesticus* mice. *Genomics* 48:221-231
9. Suchomelová E, · Munclinger P, · Frynta D. (1998) New evidence of pseudosexual behaviour and female aggression in mice: Neutral cage interactions in *Mus spicilegus* and *Mus spretus* (Rodentia: Muridae) *Folia Zoologica -Praha-* 47(4):241-247
10. Karn RC, Nachman MW. (1999) Reduced nucleotide variability at an androgen-binding protein locus (Abpa) in house mice: Evidence for positive natural selection. *Mol Biol Evol* 16: 1192-1197.
11. Bénit L, Lallemand J-B, Casella J-F, Philippe H, Heidmann T. (1999) ERV-L Elements: a family of endogenous retrovirus-like elements active throughout the evolution of mammals. *Journal of Virology* 73: 3301-3308.
12. Ivantcheva A, Cassaing J. (1999) Male-female interactions and socio-sexual isolation of *Mus spicilegus* toward two other species of east-European mice, *M. macedonicus* and *M. m. musculus*. *C.R. Acad Sci Ser III* 322:597-605.
13. Debat V, Alibert P, David P, Paradis E, Auffray JC. (2000): Independence between developmental stability and canalization in the skull of the house mouse. *Proc R Soc Biol Sci* 267:423-430.
14. Talley HM, Laukaitis CM, Karn RC. (2001) Female preference for male saliva: Implications for sexual isolation of *Mus musculus* subspecies. *Evolution* 55: 631-634.
15. Mears ML, Hutchison CA. (2001) The evolution of modern lineages of mouse L1 elements. *J Mol Evol* 52:51-62.
16. Enard W, Khaitovich P, Klose J, Zollner S, Heissig F, Giavalisco P, Nieselt-Struwe K, Muchmore E, Varki A, Ravid R, Doxiadis GM, Bontrop RE, Paabo S. (2002) Intra- and interspecific variation in primate gene expression patterns. *Science* 296:340-343.
17. Campino S, Behrschmidt C, Bagot S, Guénet JL, Cazenave PA, Holmberg D, Penha-Gonçalves C. (2002) Unique Genetic Variation Revealed by a Microsatellite Polymorphism Survey in Ten Wild-Derived Inbred Strains. *Genomics* 79:618-620.
18. Karn RC, Orth A, Bonhomme F, Boursot P. (2002) The Complex History of a Gene Proposed to Participate in a Sexual Isolation Mechanism in House Mice. *Mol Biol Evol* 19(4):462-471.
19. Capparelli R, Costabile A, Viscardi M, Iannelli D. (2004) Monoallelic expression of mouse Cd4 gene. *Mamm Genome* 15:579-584.
20. Derothe JM, Porcherie A, Perriat-Sanguinet M, Loubes C, Moulia C. (2004) Recombination does not generate pinworm susceptibility during experimental crosses between two mouse subspecies. *Parasitol Res* 93:356-363.
21. Guidry PA, Stroynowski I. (2005) The Murine Family of Gut-Restricted Class Ib MHC Includes Alternatively Spliced Isoforms of the Proposed HLA-G Homolog, "Blastocyst MHC" *J. Immunol.* 175 (8) 5248-5259; DOI: 10.4049/jimmunol.175.8.5248

22. Chevret P, Veyrunes F, Britton-Davidian J. (2005) Molecular phylogeny of the genus *Mus* (Rodentia: Murinae) based on mitochondrial and nuclear data. *Biol. J. Linn. Soc.* 84: 417–427.
23. Djian, P, Delhomme B. (2005) Systematic repeat addition at a precise location in the coding region of the involucrin gene of wild mice reveals their phylogeny. *Genetics* 169: 2199-2208.
24. Huang SW, Friedman R, Yu N, Yu A, Li WH. (2005) How strong is the mutagenicity of recombination in mammals? *Mol Biol Evol* 22:426-431.
25. Floto RA, Clatworthy MR, McAry PA, Walker EU, Heilbronn KR, Rankin A, Allen JM, Watkins NA, Smith KGC. (2005) A polymorphism of the inhibitory receptor, Fc gamma RIIb, prevents its access to lipid rafts and alters macrophage responses to immune complexes and opsonized bacteria. *Clin Immunol* 115:S214.
26. Britton-Davidian J, Fel-Clair F, Lopez J, Alibert P, Boursot P. (2005) Postzygotic isolation between the two European subspecies of the house mouse: estimates from fertility patterns in wild and laboratory-bred hybrids. *Biol J Linn Soc* 84:379-393.
27. Ganem G, Britton-Davidian J, Ostrowski MF Orth A. (2005) Assessment of mate preference in the house mouse with reference to investigations on assortative mating. *Biol J Lin Soc* 84:461-471.
28. Frynta D, Slabova M, Vachova H, Volfova R, Munclinger P. (2005) Aggression and Commensalism in House Mouse: a Comparative Study Across Europe and the Near East *Agrres Behav* (31):283–293
29. Römler H, Schulz A, Pitra C, Coop G, Przeworski M, Pääbo S, Schöneberg T. (2005) The rise and fall of the chemoattractant receptor GPR33 *J Biol Chem* 280(35):31068-75
30. Desmarais E, Belkhir K, Garza JC, Bonhomme F. (2006). Local mutagenic impact of insertions of LTR retrotransposons on the mouse genome. *J Mol Evol* 63:662-675.
31. Gomendio M, Martin-Coello J, Crespo C, Magana C, Roldan ERS. (2006) Sperm competition enhances functional capacity of mammalian spermatozoa. *P.N.A.S.* 103:15113-15117.
32. Harr B, Voolstra T, Heinen T, Baines J, Rottscheidt R, Ihle S, Muller W, Bonhomme F, Tautz D. (2006) A change of expression in the conserved signalling gene *MKK7* is associated with a selective sweep in the western house mouse *Mus musculus domesticus*. *J Evol Biol* 19:1486-1496.
33. Rompler, H., H.T. Yu, A. Arnold, A. Orth, and T. Schoneberg. (2006) Functional consequences of naturally occurring DRY motif variants in the mammalian chemoattractant receptor GPR33. *Genomics* 87: 724-732.
34. Limaye N, Belobrajdic K, Bonhomme F, Edwards S, Wakeland E. (2007) Prevalence and Evolutionary Origins of Autoimmune Susceptibility Alleles in Natural Mouse Populations. *Genes Immunity* 9: 61-68.
35. de Bellocq J, Porcherie A, Moulia C. (2007) Immunocompetence does not correlate with resistance to helminth parasites in house mouse subspecies and their hybrids. *Parasitol Res* 100:321-328
36. Cassaing J, Isaac F. (2007) Pair bonding in the wild mouse *Mus spretus*: inference on the mating system. *C R Biologies* 330:828-836.
37. Bois PJ. (2007) A Highly Polymorphic Meiotic Recombination Mouse Hot Spot Exhibits Incomplete Repair *Mol. Cell. Biol.* 27 (20):7053-7062
38. Voolstra, C, Tautz D, Farbrother P, Eichinger L, Harr B. (2007) Contrasting evolution of expression differences in the testis between species and subspecies of the house mouse. *Genome Res.* 17: 42-49.
39. Burgio G, Szatanik M, Guénet JL, Arnau MR, Panthier JJ, Montagutelli X. (2007) Interspecific Recombinant Congenic Strains Between C57BL/6 and Mice of the *Mus spretus* Species: A Powerful Tool to Dissect Genetic Control of Complex Traits *Genetics* 177(4):2321-2333; DOI: 10.1534/genetics.107.078006
40. Bonhomme F, Rivals E, Orth A, Grant GR, Jeffreys A.J, Bois PR. (2007) Species-wide distribution of highly polymorphic minisatellite markers suggests past and present genetic exchanges among house mouse subspecies. *Genome Biol* 8: R80. DOI: 10.1186/gb-2007-8-5-r80
41. Ferguson W, Dvora S, Gallo J, Orth A, Boissinot S. (2008) Long-term balancing selection at the West Nile virus resistance gene, *Oas1b*, maintains transspecific polymorphisms in the house mouse. *Mol Biol Evol* 25:1609-1618.
42. Houzelstein D, Gonçalves I, Orth A, Bonhomme F, Netter P. (2008) *Lgals6*, a two million years old gene in mice: a case of positive Darwinian selection and presence/absence polymorphism. *Genetics* 178:1533–1545 DOI: 1534/genetics.107.082792
43. Martín-Coello JR, González R, Crespo C, Gomendio M, Roldan ERS. (2008) Superovulation and in vitro oocyte maturation in three species of mice (*Mus musculus*, *Mus spretus* and *Mus spicilegus*). *Theriogenology* 70:1004-1013.
44. Smadja C, Ganem G. (2008) Divergence of odorant signals within and between the two European subspecies of the house mouse. *Behav Ecol* 19:223-230.
45. Henrichsen C, Vinckenbosch N, Zöllner S, Chaignat E, Pradervand S, Schütz F, Ruedi M, Kaessmann H, Reymond A. (2009) Segmental copy number variation shapes tissue transcriptomes. *Nature Genet* 41:424-429.

46. Renaud S, Alibert P, Auffray J-C. (2009) Mandible shape in hybrid mice. *Naturwissenschaften* 96: 1043-1050.
47. Martin-Coello J, Benavent-Corai J, Roldan ERS, Gomendio M. (2009) Sperm competition promotes asymmetries in reproductive barriers between closely related species. *Evolution* 63: 613-623.
48. Thiriot A, Drapiera A, Mémet S, Fitting C, Sturny-Leclere A, Cavaillon J, Cazenave PA, Freitas AA, Rueff-Juy D. (2009) Wild-derived mouse strains, a valuable model to study B cell responses. *Mol Immunol* 46: 601-612.
49. Tobias JA, Heinen J, Staubach F, Häming F, Tautz D. (2009) Emergence of a New Gene from an Intergenic Region. *Curr Biol* 19:1527–1531
50. Martin-Coello J, Hernan D, Arbiza L, Ausio J, Roldan ERS, Gomendio M. (2009) Sexual selection drives weak positive selection in protamine genes and high promoter divergence, enhancing sperm competitiveness *Proc. R. Soc. B* 276: 2427-2436; DOI:10.1098/rspb.2009.0257
51. Levi-Acobas F, Mars LT, Orth A, Bureau JF, Bonhomme F. (2009) Adaptive evolution of interferon gamma in Glire lineage and evidence for a recent selective sweep in *Mus. m. domesticus*. *Genes Immunity* 10:297-308.
52. Cassaing J, Cervera S, Isaac F. (2010) Laboratory and field evidence of paternal care in the Algerian mouse (*Mus spretus*). *J Ethol* 28:7-13.
53. Halligan D, Oliver F, Eyre-Walker A, Harr B, Keightley P. (2010) Evidence for Pervasive Adaptive Protein Evolution in Wild Mice. *Plos Genetics* 6, 1-9.
54. Mucignat-Caretta C, Redaelli M, Orsetti A, Perriat-Sanguinet M, Zagotto G, Ganem G. (2010) Urinary Volatile Molecules Vary in Males of the 2 European Subspecies of the House Mouse and Their Hybrids. *Chem Senses* 35:647-654.
55. Duvaux L, Belkhir K, Boulesteix M, Boursot P. (2011) Isolation and gene flow: inferring the speciation history of European house mouse. *Mol Ecol* 20:5248-5264.
56. Mucignat-Caretta C, Redaelli M, Orsetti A, Perriat-Sanguinet M, Zagotto G, Ganem G. (2011) Females of two subspecies of mice differ in their urinary volatile profile. *Chem Senses* 36:E47-E48.
57. Cazaux B, Catalan J, Veyrunes F, Douzery EJ, Britton-Davidian J. (2011) Are ribosomal DNA clusters rearrangement hotspots? 2011. A case study in the genus *Mus* (Rodentia, Muridae). *BMC Evol Biol* 11:124. doi: 10.1186/1471-2148-11-124
58. Yang HN, Wang JR, Didion JP, Buus RJ, Bell TA, Welsh CE, Bonhomme F, Yu AHT, Nachman MW, Pialek J, Tucker P, Boursot P, McMillan L, Churchill GA, de Villena FP. (2011) Subspecific origin and haplotype diversity in the laboratory mouse. *Nat Genet* 43(7):648-55. doi: 10.1038/ng.847
59. Martin-Coello J, Gomendio M, Roldan ERS. (2011) Protamine 3 Shows Evidence of Weak, Positive Selection in Mouse Species (Genus *Mus*)-But It Is Not a Protamine. *Biol Reprod* 84:320-326.
60. Montoto LG, Arregui L, Sánchez NM, Gomendio M, Roldan ERS. (2012) Postnatal testicular development in mouse species with different levels of sperm competition. *Reproduction* 143(3):333-46. doi: 10.1530/REP-11-0245.
61. Li Y, Robins JH, Ye J, Huang Z, Wen Q, Zhang G. (2012) Adaptive diversity of innate immune receptor family short pentraxins in Murinae. *FEBS Letters* 586:798-803.
62. Espéli M, Clatworthy MR, Bökers S, Lawlor KE, Cutler AJ, Köntgen F, Lyons PA, Kenneth GC. (2012) Analysis of a wild mouse promoter variant reveals a novel role for *FcyRIIb* in the control of the germinal center and autoimmunity *Smith J Exp Medic* 209(12):2307-2319; DOI: 10.1084/jem.20121752
63. Phifer-Rixey M, Bonhomme F, Boursot P, Churchill GA, Pialek J, Tucker PK, Nachman MW. (2012) Adaptive evolution and effective population size in wild house mice. *Mol Biol Evol* 29(10):2949-55.
64. Lilue J, Müller UB, Steinfeldt T, Howard JC. (2013) Reciprocal virulence and resistance polymorphism in the relationship between *Toxoplasma gondii* and the house mouse *eLife* 2:e01298. DOI: 10.7554/eLife.01298
65. Macholán M, Mrkvicová Vyskočilová M, Bejček V, Štastný K. (2012) Mitochondrial DNA sequence variation and Evolution of Old World house mice (*Mus musculus*) *Folia Zool* 61:284-307
66. Staubach F, Lorenc A, Messer PW, Tang K, Petrov DA, Tautz D. (2012) Genome Patterns of Selection and Introgression of Haplotypes in Natural Populations of the House Mouse (*Mus musculus*). *PLOS Genet* 43(7):648-55. doi: 10.1038/ng.847.
67. Lüke L, Campbell P, Varea Sánchez M, Nachman MW, Roldan ERS (2014) Sexual selection on protamine and transition nuclear protein expression in mouse species. *Proc R S Biol Sci* 281(1783): 20133359. doi: 10.1098/rspb.2013.3359
68. Buard J, Rivals E, Dunoyer de Segonzac D, Garres C, Caminade P, de Massy B, Boursot P. (2014) Diversity of Prdm9 Zinc Finger Array in Wild Mice Unravels New Facets of the Evolutionary Turnover of this Coding Minisatellite. *PLoS One* 9(1): e85021.

69. Didion J, Buus R, Naghashfar Z, Threadgill DW, Morse HC III, Pardo-Manuel de Villena FP. (2014) SNP array profiling of mouse cell lines identifies their strains of origin and reveals cross-contamination and widespread aneuploidy. *BMC Genomics* 15, 847. DOI: 10.1186/1471-2164-15-847
70. Mangels R, Young B, Keeble S, Ardekani R, Meslin C, Ferreira Z, Clark NL, Good JM, Dean MD. (2015) Genetic and phenotypic influences on copulatory plug survival in mice *Heredity* 115:496–502; doi:10.1038/hdy.2015.50.
71. Hasenkamp N, Solomon T, Tautz D. (2015) Selective sweeps versus introgression - population genetic dynamics of the murine leukemia virus receptor Xpr1 in wild populations of the house mouse (*Mus musculus*). *BMC Evol Biol* 15, 248 doi: 10.1186/s12862-015-0528-5
72. Hardouin EA, Orth A, Teschke M, Darvish J, Tautz D, Bonhomme F. (2015) Eurasian house mouse (*Mus musculus* L.) differentiation at microsatellite loci identifies the Iranian plateau as a phylogeographic hotspot. *BMC Evolutionary Biology* 15:26 doi:10.1186/s12862-015-0306-4
73. Morgan AP, Fu CP, Kao CY, Welsh CE, Didion JP, Yadgary L, ... Pardo-Manuel de Villena FM. (2016) The Mouse Universal Genotyping Array: From Substrains to Subspecies. *G3:Genes|Genomes|Genetics*. 6(2): 263–279.
74. Bamunusinghe D, Naghashfar Z, Buckler-White A, Plishka R, Baliji S, Li, Q, Kassner J, Oler AJ, Hartley J, Kozak CA. (2016) Sequence Diversity, Intersubgroup Relationships, and Origins of the Mouse Leukemia Gammaretroviruses of Laboratory and Wild Mice. *J. Virol* 90:4186-4198.
75. Tourmente M, Zarka-Trigo D, Roldan ERS. (2016) Is the hook of muroid rodent's sperm related to sperm train formation? *J Evol Biol* 29:1168-1177.
76. Larson EL, Vanderpool D, Keeble S, Zhou M, Sarver BAJ, Smith AD, Dean MD, Good JM. (2016) Contrasting Levels of Molecular Evolution on the Mouse X Chromosome. *Genetics* 203(4):1841-1857
