# Supplementary material
Source: PubMed Central journal article supplement (PMC5693759)
Supplement: NIHMS900499-supplement-335_2017_9704_MOESM8_ESM.pdf [file NIHMS900499-supplement-335_2017_9704_MOESM8_ESM.pdf]

Supplementary Table 3

| Strain                                   | 22MO      | BID       | BIK       | BZO       | CIM       | DCA       | DCP       | DDO       | DEB       | DGA      | DIK       | DJO       | DMZ       | DOT       | KAK       | MAM       | MBS       | MGA       | MPB       | MPR       | SEG       | SFM       | STF       | TEH       | WLA       | WMP      |
|------------------------------------------|-----------|-----------|-----------|-----------|-----------|-----------|-----------|-----------|-----------|----------|-----------|-----------|-----------|-----------|-----------|-----------|-----------|-----------|-----------|-----------|-----------|-----------|-----------|-----------|-----------|----------|
| <b>Total Reads</b>                       | 13032282  | 20391478  | 19013998  | 11672866  | 22906496  | 10788224  | 19304716  | 18669268  | 11527794  | 10307068 | 22695454  | 42302806  | 10800392  | 9856062   | 18985116  | 12031312  | 17367078  | 21107480  | 21959984  | 29677942  | 32613668  | 38726724  | 25004662  | 26446312  | 23045684  | 6962372  |
| <b>Mapped Reads across genome</b>        | 11027732  | 16653886  | 10704954  | 7960379   | 19520290  | 8441870   | 16270277  | 12465729  | 8158792   | 5005619  | 9952271   | 33809994  | 8603635   | 7499299   | 12531343  | 11043793  | 12960254  | 18537971  | 14192279  | 21990755  | 22099899  | 32118487  | 16160167  | 21699441  | 19530333  | 4505773  |
| <b>Mapped Fraction</b>                   | 0.846     | 0.817     | 0.563     | 0.682     | 0.852     | 0.783     | 0.843     | 0.668     | 0.708     | 0.486    | 0.439     | 0.799     | 0.797     | 0.761     | 0.660     | 0.918     | 0.746     | 0.878     | 0.646     | 0.741     | 0.678     | 0.829     | 0.646     | 0.821     | 0.847     | 0.647    |
| <b>Genome Coverage (bp)</b>              | 131744624 | 161323376 | 125356376 | 123244218 | 165447694 | 134892847 | 153702000 | 141497919 | 125952859 | 82695371 | 120492255 | 190270537 | 138261999 | 125509169 | 143364819 | 124580647 | 158715501 | 161555938 | 146350884 | 177246070 | 171756871 | 178485229 | 162075574 | 176944340 | 151071040 | 60537868 |
| <b>Estimated Depth</b>                   | 5.024098  | 7.331901  | 7.32702   | 5.792177  | 8.432837  | 5.832754  | 6.429408  | 7.9404    | 5.815566  | 3.402467 | 5.739196  | 12.80038  | 5.786645  | 5.558432  | 7.763061  | 6.395934  | 7.481528  | 8.279401  | 8.712514  | 8.687416  | 8.60317   | 12.76662  | 5.764953  | 8.760539  | 9.304195  | 3.775832 |
| <b>Mapped Reads across exome regions</b> | 7328062   | 11936658  | 8028707   | 6038820   | 14147186  | 6261381   | 10911341  | 9536306   | 5914073   | 2387391  | 6227363   | 25045743  | 6288619   | 5620640   | 9491369   | 8295856   | 9530247   | 13478466  | 10935171  | 15838048  | 15388563  | 23479564  | 10139082  | 15717375  | 14723429  | 2081024  |
| <b>Mapped Fraction</b>                   | 0.562     | 0.585     | 0.422     | 0.517     | 0.618     | 0.580     | 0.565     | 0.511     | 0.513     | 0.232    | 0.274     | 0.592     | 0.582     | 0.570     | 0.500     | 0.690     | 0.549     | 0.639     | 0.498     | 0.534     | 0.472     | 0.606     | 0.405     | 0.594     | 0.639     | 0.299    |
| <b>Exome Coverage (bp)</b>               | 50194077  | 52569421  | 49163454  | 49920240  | 52533361  | 51294768  | 51932015  | 51715858  | 48409387  | 34010289 | 45073242  | 53257128  | 51442972  | 50566163  | 51949555  | 48899527  | 51753557  | 52451280  | 52021322  | 52890742  | 52620609  | 52782729  | 51797024  | 52937771  | 52197904  | 26943632 |
| <b>Estimated Depth</b>                   | 7.913     | 13.535    | 11.798    | 8.858     | 16.127    | 9.191     | 11.558    | 13.620    | 8.982     | 3.644    | 8.644     | 28.332    | 9.203     | 8.355     | 13.360    | 10.187    | 13.741    | 15.462    | 15.503    | 17.647    | 17.018    | 26.684    | 10.540    | 17.716    | 17.024    | 3.755    |
| <b>Number of SNPs in WDIS</b>            | 1399743   |           |           |           |           |           |           |           |           |          |           |           |           |           |           |           |           |           |           |           |           |           |           |           |           |          |
| <b>Number of Called SNPs</b>             | 1070593   | 1252640   | 979815    | 1044663   | 1261693   | 1113301   | 1162528   | 1104971   | 1066391   | 588085   | 869956    | 1314249   | 1136411   | 1058744   | 1114342   | 1094794   | 1177700   | 1257165   | 1104613   | 1272456   | 1241372   | 1297991   | 1115988   | 1282594   | 1218329   | 376801   |
| <b>Average Depth of Called SNPs</b>      | 4.824     | 8.567     | 7.442     | 5.806     | 10.253    | 5.865     | 6.816     | 8.432     | 5.934     | 2.376    | 5.249     | 16.841    | 5.913     | 5.409     | 8.133     | 6.860     | 8.523     | 9.822     | 9.330     | 10.981    | 10.133    | 15.983    | 6.217     | 10.986    | 10.542    | 2.212    |
