# Supplementary material
Source: PubMed Central journal article supplement (PMC5693759)
Supplement: NIHMS900499-supplement-335_2017_9704_MOESM10_ESM.pdf [file NIHMS900499-supplement-335_2017_9704_MOESM10_ESM.pdf]

**Supplementary Table 4. Number of SNPs discovered across "All Genotypes", each respective species analyzed separately, or each respective species removed. Table divided according to whether SNPs were also found in dbSNP (top panel), total WDIS dataset (middle panel), or not found in dbSNP (bottom panel)**

(EFF=various functional annotations taken from Ensembl.)

|                                                                  | All Genotypes                                 | castaneus only                        | domesticus only                       | musculus only                         | spretus only                          | castaneus removed | domesticus removed                      | musculus removed                        | spretus removed                         |                                         |
|------------------------------------------------------------------|-----------------------------------------------|---------------------------------------|---------------------------------------|---------------------------------------|---------------------------------------|-------------------|-----------------------------------------|-----------------------------------------|-----------------------------------------|-----------------------------------------|
| ALSO found in dbSNP                                              |                                               |                                       |                                       |                                       |                                       |                   |                                         |                                         |                                         |                                         |
| Broken down into                                                 |                                               |                                       |                                       |                                       |                                       |                   |                                         |                                         |                                         |                                         |
| EFF=NON_SYNONYMOUS_CODING                                        | 18                                            | 7                                     | 11                                    | 12                                    | 16                                    | 0                 | 18                                      | 17                                      | 17                                      |                                         |
| EFF=CODON_CHANGE_PLUS_CODON_DELETION                             | 189                                           | 49                                    | 103                                   | 83                                    | 125                                   | 0                 | 184                                     | 180                                     | 131                                     |                                         |
| EFF=CODON_CHANGE_PLUS_CODON_INSERTION                            | 75                                            | 27                                    | 45                                    | 39                                    | 54                                    | 0                 | 72                                      | 72                                      | 55                                      |                                         |
| EFF=CODON_DELETION                                               | 324                                           | 73                                    | 176                                   | 134                                   | 227                                   | 0                 | 318                                     | 308                                     | 225                                     |                                         |
| EFF=CODON_INSERTION                                              | 321                                           | 129                                   | 202                                   | 177                                   | 255                                   | 0                 | 316                                     | 314                                     | 243                                     |                                         |
| EFF=FRAME_SHIFT                                                  | 220                                           | 74                                    | 143                                   | 117                                   | 170                                   | 0                 | 219                                     | 214                                     | 168                                     |                                         |
| EFF=FRAME_SHIFT+SPLICE_SITE_ACCEPTOR+INTRON                      | 2                                             | 1                                     | 2                                     | 2                                     | 2                                     | 0                 | 2                                       | 2                                       | 2                                       |                                         |
| EFF=FRAME_SHIFT+SPLICE_SITE_DONOR+INTRON                         | 12                                            | 6                                     | 8                                     | 5                                     | 7                                     | 0                 | 11                                      | 12                                      | 10                                      |                                         |
| EFF=FRAME_SHIFT+START_LOST                                       | 6                                             | 1                                     | 4                                     | 2                                     | 4                                     | 0                 | 6                                       | 5                                       | 4                                       |                                         |
| EFF=FRAME_SHIFT+STOP_GAINED                                      | 6                                             | 1                                     | 4                                     | 2                                     | 6                                     | 0                 | 6                                       | 6                                       | 4                                       |                                         |
| EFF=FRAME_SHIFT+STOP_LOST                                        | 14                                            | 3                                     | 8                                     | 3                                     | 13                                    | 0                 | 14                                      | 14                                      | 8                                       |                                         |
| EFF=SPLICE_SITE_ACCEPTOR+CODON_CHANGE_PLUS_CODON_DELETION+INTRON | 2                                             | 0                                     | 0                                     | 0                                     | 2                                     | 0                 | 2                                       | 2                                       | 0                                       |                                         |
| EFF=SPLICE_SITE_ACCEPTOR+INTRON                                  | 46                                            | 13                                    | 21                                    | 22                                    | 34                                    | 0                 | 44                                      | 46                                      | 32                                      |                                         |
| EFF=SPLICE_SITE_ACCEPTOR+INTRON+EXON                             | 1                                             | 1                                     | 0                                     | 1                                     | 0                                     | 0                 | 1                                       | 1                                       | 1                                       |                                         |
| EFF=SPLICE_SITE_ACCEPTOR+SPLICE_SITE_DONOR+INTRON                | 11                                            | 10                                    | 11                                    | 11                                    | 11                                    | 0                 | 11                                      | 11                                      | 11                                      |                                         |
| EFF=SPLICE_SITE_ACCEPTOR+UTR_5_PRIME+INTRON                      | 2                                             | 1                                     | 1                                     | 1                                     | 2                                     | 0                 | 2                                       | 2                                       | 1                                       |                                         |
| EFF=SPLICE_SITE_DONOR+INTRON                                     | 45                                            | 10                                    | 24                                    | 23                                    | 31                                    | 0                 | 45                                      | 40                                      | 36                                      |                                         |
| EFF=SPLICE_SITE_DONOR+INTRON+EXON                                | 3                                             | 0                                     | 1                                     | 1                                     | 2                                     | 0                 | 3                                       | 3                                       | 1                                       |                                         |
| EFF=SPLICE_SITE_DONOR+UTR_5_PRIME+INTRON                         | 1                                             | 0                                     | 0                                     | 0                                     | 1                                     | 0                 | 1                                       | 1                                       | 0                                       |                                         |
| EFF=START_GAINED                                                 | 7                                             | 5                                     | 6                                     | 7                                     | 7                                     | 0                 | 7                                       | 7                                       | 7                                       |                                         |
| EFF=STOP_GAINED+CODON_CHANGE_PLUS_CODON_INSERTION                | 1                                             | 1                                     | 0                                     | 1                                     | 0                                     | 0                 | 1                                       | 1                                       | 1                                       |                                         |
| EFF=STOP_GAINED+CODON_INSERTION                                  | 2                                             | 0                                     | 0                                     | 0                                     | 2                                     | 0                 | 2                                       | 2                                       | 0                                       |                                         |
| EFF=STOP_LOST+CODON_DELETION                                     | 3                                             | 0                                     | 2                                     | 0                                     | 3                                     | 0                 | 3                                       | 3                                       | 2                                       |                                         |
| EFF=EXON                                                         | 188                                           | 67                                    | 100                                   | 115                                   | 120                                   |                   | 184                                     | 178                                     | 168                                     |                                         |
| EFF=UTR_3_PRIME                                                  | 13773                                         | 4426                                  | 7669                                  | 6760                                  | 10183                                 |                   | 13513                                   | 13357                                   | 12990                                   |                                         |
| EFF=UTR_5_PRIME                                                  | 1638                                          | 541                                   | 943                                   | 790                                   | 1245                                  |                   | 1606                                    | 1577                                    | 1567                                    |                                         |
| EFF=INTRON                                                       | 60289                                         | 18670                                 | 28641                                 | 32406                                 | 42504                                 |                   | 59415                                   | 58070                                   | 55237                                   |                                         |
| EFF=INTERGENIC                                                   | 5378                                          | 1290                                  | 2688                                  | 3381                                  | 2443                                  |                   | 5298                                    | 4784                                    | 4238                                    |                                         |
| EFF=UPSTREAM                                                     | 8633                                          | 2529                                  | 4577                                  | 4179                                  | 6408                                  |                   | 8518                                    | 8337                                    | 8021                                    |                                         |
| EFF=DOWNSTREAM                                                   | 9953                                          | 2911                                  | 4977                                  | 4910                                  | 7259                                  |                   | 9793                                    | 9612                                    | 9229                                    |                                         |
| ALSO found in dbSNP                                              |                                               |                                       |                                       |                                       |                                       |                   |                                         |                                         |                                         |                                         |
| Broken down into                                                 |                                               |                                       |                                       |                                       |                                       |                   |                                         |                                         |                                         |                                         |
| Non-synonymous                                                   | 1311                                          | 412                                   | 772                                   | 643                                   | 974                                   |                   | 1288                                    | 1265                                    | 1246                                    |                                         |
| Synonymous                                                       | 188                                           | 67                                    | 100                                   | 115                                   | 120                                   |                   | 184                                     | 178                                     | 168                                     |                                         |
| UTR_3_PRIME                                                      | 13773                                         | 4426                                  | 7669                                  | 6760                                  | 10183                                 |                   | 13513                                   | 13357                                   | 12990                                   |                                         |
| UTR_5_PRIME                                                      | 1638                                          | 541                                   | 943                                   | 790                                   | 1245                                  |                   | 1606                                    | 1577                                    | 1567                                    |                                         |
| Intronic                                                         | 60289                                         | 18670                                 | 28641                                 | 32406                                 | 42504                                 |                   | 59415                                   | 58070                                   | 55237                                   |                                         |
| Intergenic                                                       | 23964                                         | 6730                                  | 12242                                 | 12470                                 | 16110                                 |                   | 23609                                   | 22733                                   | 21488                                   |                                         |
| ALSO found in dbSNP fraction                                     | OK<br>101163<br>=101163/152342<br>0.664051936 | OK<br>30846<br>=30846/101163<br>0.305 | OK<br>50367<br>=50367/101163<br>0.498 | OK<br>53184<br>=53184/101163<br>0.526 | OK<br>71136<br>=71136/101163<br>0.703 |                   | OK<br>99615<br>=99615/101163<br>0.985   | OK<br>97180<br>=97180/101163<br>0.961   | OK<br>92696<br>=92696/101163<br>0.916   | OK<br>73290<br>=73290/101163<br>0.724   |
| VF Filtering                                                     | OK<br>152342                                  | OK<br>41183<br>=41183/152342<br>0.270 | OK<br>68974<br>=68974/152342<br>0.453 | OK<br>73707<br>=73707/152342<br>0.484 | OK<br>98564<br>=98564/152342<br>0.647 |                   | OK<br>147503<br>=147503/152342<br>0.968 | OK<br>142898<br>=142898/152342<br>0.938 | OK<br>134930<br>=134930/152342<br>0.886 | OK<br>108220<br>=108220/152342<br>0.710 |

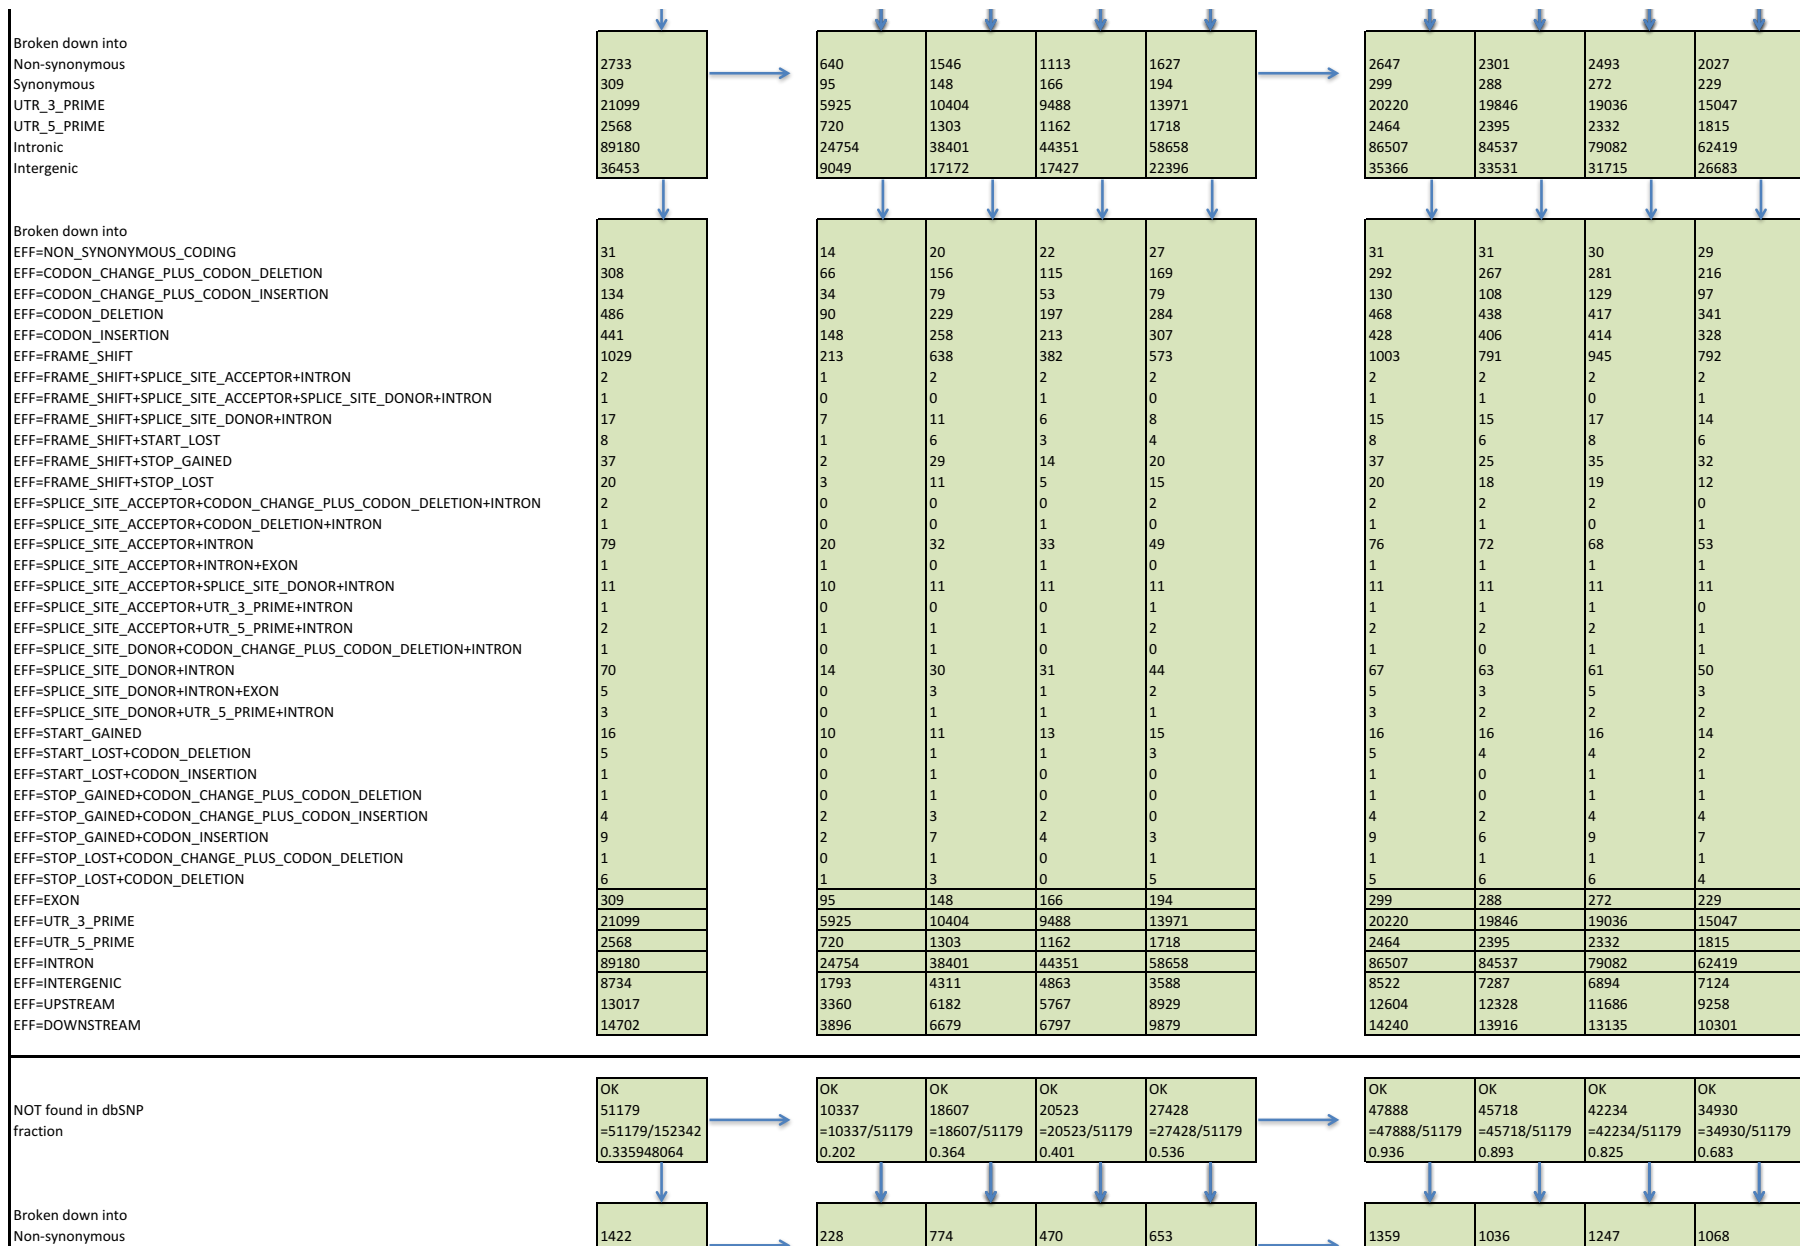

Synonymous  
 UTR\_3\_PRIME  
 UTR\_5\_PRIME  
 Intronic  
 Intergenic

|       |
|-------|
| 121   |
| 7326  |
| 930   |
| 28891 |
| 12489 |

|      |      |       |       |
|------|------|-------|-------|
| 28   | 48   | 51    | 74    |
| 1499 | 2735 | 2728  | 3788  |
| 179  | 360  | 372   | 473   |
| 6084 | 9760 | 11945 | 16154 |
| 2319 | 4930 | 4957  | 6286  |

|       |       |       |       |
|-------|-------|-------|-------|
| 115   | 110   | 104   | 83    |
| 6707  | 6489  | 6046  | 5063  |
| 858   | 818   | 765   | 643   |
| 27092 | 26467 | 23845 | 19246 |
| 11757 | 10798 | 10227 | 8827  |

NOT found in dbSNP  
 Broken down into  
 EFF=NON\_SYNONYMOUS\_CODING  
 EFF=CODON\_CHANGE\_PLUS\_CODON\_DELETION  
 EFF=CODON\_CHANGE\_PLUS\_CODON\_INSERTION  
 EFF=CODON\_DELETION  
 EFF=CODON\_INSERTION  
 EFF=FRAME\_SHIFT  
 EFF=FRAME\_SHIFT+SPLICE\_SITE\_ACCEPTOR+SPLICE\_SITE\_DONOR+INTRON  
 EFF=FRAME\_SHIFT+SPLICE\_SITE\_DONOR+INTRON  
 EFF=FRAME\_SHIFT+START\_LOST  
 EFF=FRAME\_SHIFT+STOP\_GAINED  
 EFF=FRAME\_SHIFT+STOP\_LOST  
 EFF=SPLICE\_SITE\_ACCEPTOR+CODON\_DELETION+INTRON  
 EFF=SPLICE\_SITE\_ACCEPTOR+INTRON  
 EFF=SPLICE\_SITE\_ACCEPTOR+UTR\_3\_PRIME+INTRON  
 EFF=SPLICE\_SITE\_DONOR+CODON\_CHANGE\_PLUS\_CODON\_DELETION+INTRON  
 EFF=SPLICE\_SITE\_DONOR+INTRON  
 EFF=SPLICE\_SITE\_DONOR+INTRON+EXON  
 EFF=SPLICE\_SITE\_DONOR+UTR\_5\_PRIME+INTRON  
 EFF=START\_GAINED  
 EFF=START\_LOST+CODON\_DELETION  
 EFF=START\_LOST+CODON\_INSERTION  
 EFF=STOP\_GAINED+CODON\_CHANGE\_PLUS\_CODON\_DELETION  
 EFF=STOP\_GAINED+CODON\_CHANGE\_PLUS\_CODON\_INSERTION  
 EFF=STOP\_GAINED+CODON\_INSERTION  
 EFF=STOP\_LOST+CODON\_CHANGE\_PLUS\_CODON\_DELETION  
 EFF=STOP\_LOST+CODON\_DELETION  
 EFF=EXON  
 EFF=UTR\_3\_PRIME  
 EFF=UTR\_5\_PRIME  
 EFF=INTRON  
 EFF=INTERGENIC  
 EFF=UPSTREAM  
 EFF=DOWNSTREAM

|       |
|-------|
| 13    |
| 119   |
| 59    |
| 162   |
| 120   |
| 809   |
| 1     |
| 5     |
| 2     |
| 31    |
| 6     |
| 1     |
| 33    |
| 1     |
| 1     |
| 25    |
| 2     |
| 2     |
| 9     |
| 5     |
| 1     |
| 1     |
| 3     |
| 7     |
| 1     |
| 3     |
| 121   |
| 7326  |
| 930   |
| 28891 |
| 3356  |
| 4384  |
| 4749  |

|      |      |       |       |
|------|------|-------|-------|
| 7    | 9    | 10    | 11    |
| 17   | 53   | 32    | 44    |
| 7    | 34   | 14    | 25    |
| 17   | 53   | 63    | 57    |
| 19   | 56   | 36    | 52    |
| 139  | 495  | 265   | 403   |
| 0    | 0    | 1     | 0     |
| 1    | 3    | 1     | 1     |
| 0    | 2    | 1     | 0     |
| 1    | 25   | 12    | 14    |
| 0    | 3    | 2     | 2     |
| 0    | 0    | 1     | 0     |
| 7    | 11   | 11    | 15    |
| 0    | 0    | 0     | 1     |
| 0    | 1    | 0     | 0     |
| 4    | 6    | 8     | 13    |
| 0    | 2    | 0     | 0     |
| 0    | 1    | 1     | 0     |
| 5    | 5    | 6     | 8     |
| 0    | 1    | 1     | 3     |
| 0    | 1    | 0     | 0     |
| 0    | 1    | 0     | 0     |
| 1    | 3    | 1     | 0     |
| 2    | 7    | 4     | 1     |
| 0    | 1    | 0     | 1     |
| 1    | 1    | 0     | 2     |
| 28   | 48   | 51    | 74    |
| 1499 | 2735 | 2728  | 3788  |
| 179  | 360  | 372   | 473   |
| 6084 | 9760 | 11945 | 16154 |
| 2319 | 4930 | 4957  | 6286  |
| 503  | 1623 | 1482  | 1145  |
| 831  | 1605 | 1588  | 2521  |
| 985  | 1702 | 1887  | 2620  |

|       |       |       |       |
|-------|-------|-------|-------|
| 13    | 13    | 13    | 12    |
| 108   | 86    | 101   | 85    |
| 58    | 36    | 57    | 42    |
| 150   | 130   | 117   | 116   |
| 112   | 92    | 101   | 85    |
| 784   | 577   | 735   | 624   |
| 1     | 1     | 0     | 1     |
| 4     | 3     | 5     | 4     |
| 2     | 1     | 2     | 2     |
| 31    | 19    | 29    | 28    |
| 6     | 4     | 5     | 4     |
| 1     | 1     | 0     | 1     |
| 32    | 26    | 27    | 21    |
| 1     | 1     | 1     | 0     |
| 1     | 0     | 1     | 1     |
| 22    | 23    | 21    | 14    |
| 2     | 0     | 2     | 2     |
| 2     | 1     | 1     | 2     |
| 9     | 9     | 9     | 7     |
| 5     | 4     | 4     | 2     |
| 1     | 0     | 1     | 1     |
| 1     | 0     | 1     | 1     |
| 3     | 1     | 3     | 3     |
| 7     | 4     | 7     | 7     |
| 1     | 1     | 1     | 1     |
| 2     | 3     | 3     | 2     |
| 115   | 110   | 104   | 83    |
| 6707  | 6489  | 6046  | 5063  |
| 858   | 818   | 765   | 643   |
| 27092 | 26467 | 23845 | 19246 |
| 11757 | 10798 | 10227 | 8827  |
| 3224  | 2503  | 2656  | 2657  |
| 4086  | 3991  | 3665  | 2938  |
| 4447  | 4304  | 3906  | 3232  |
