# Supplementary material
Source: PubMed Central journal article supplement (PMC5693759)
Supplement: NIHMS900499-supplement-335_2017_9704_MOESM12_ESM.pdf [file NIHMS900499-supplement-335_2017_9704_MOESM12_ESM.pdf]

**Supplementary Table 6.** Results of ABBA-BABA tests.

Legend: DOM\_strain=Wild-derived *M. m. domesticus* strain which was included in the ABBA-BABA test; ABBA and BABA=the number of ABBA or BABA sites counted; N\_windows=The number of 5 Mb windows that contained at least 20 ABBA-BABA sites; remaining columns=statistics associated with the ABBA-BABA jackknife permutation.

| DOM_strain | ABBA | BABA | N_windows | jackVar    | jackEst    | thetaEst   | Z          |
|------------|------|------|-----------|------------|------------|------------|------------|
| X22MO      | 734  | 551  | 43        | 0.00249832 | 0.1424125  | 0.1424125  | 2.84921    |
| BIK        | 1078 | 1315 | 67        | 0.00079276 | -0.0990389 | -0.0990389 | -3.517508  |
| BZO        | 695  | 757  | 47        | 0.00222836 | -0.0426997 | -0.0426997 | -0.9045505 |
| DCA        | 862  | 1084 | 63        | 0.00208847 | -0.1140802 | -0.1140802 | -2.496296  |
| DCP        | 1745 | 1420 | 87        | 0.000593   | 0.1026856  | 0.1026856  | 4.216791   |
| DDO        | 1226 | 1680 | 85        | 0.00112977 | -0.1562285 | -0.1562285 | -4.647982  |
| DEB        | 496  | 728  | 37        | 0.00271613 | -0.1895425 | -0.1895425 | -3.636897  |
| DGA        | 0    | 0    | 0         | NaN        | NaN        | NaN        | NaN        |
| DIK        | 332  | 493  | 24        | 0.00280472 | -0.1951515 | -0.1951515 | -3.684913  |
| DJO        | 5076 | 4390 | 205       | 0.0003529  | 0.07246989 | 0.07246989 | 3.857707   |
| DMZ        | 1005 | 1094 | 66        | 0.00147402 | -0.0424011 | -0.0424011 | -1.104398  |
| DOT        | 962  | 1300 | 67        | 0.00189851 | -0.1494253 | -0.1494253 | -3.429394  |
| WLA        | 3492 | 3023 | 161       | 0.00038714 | 0.07198772 | 0.07198772 | 3.658658   |
| WMP        | 0    | 0    | 0         | NaN        | NaN        | NaN        | NaN        |
