# Supplementary material
Source: PubMed Central journal article supplement (PMC5693759)

# Supplementary Figure 3

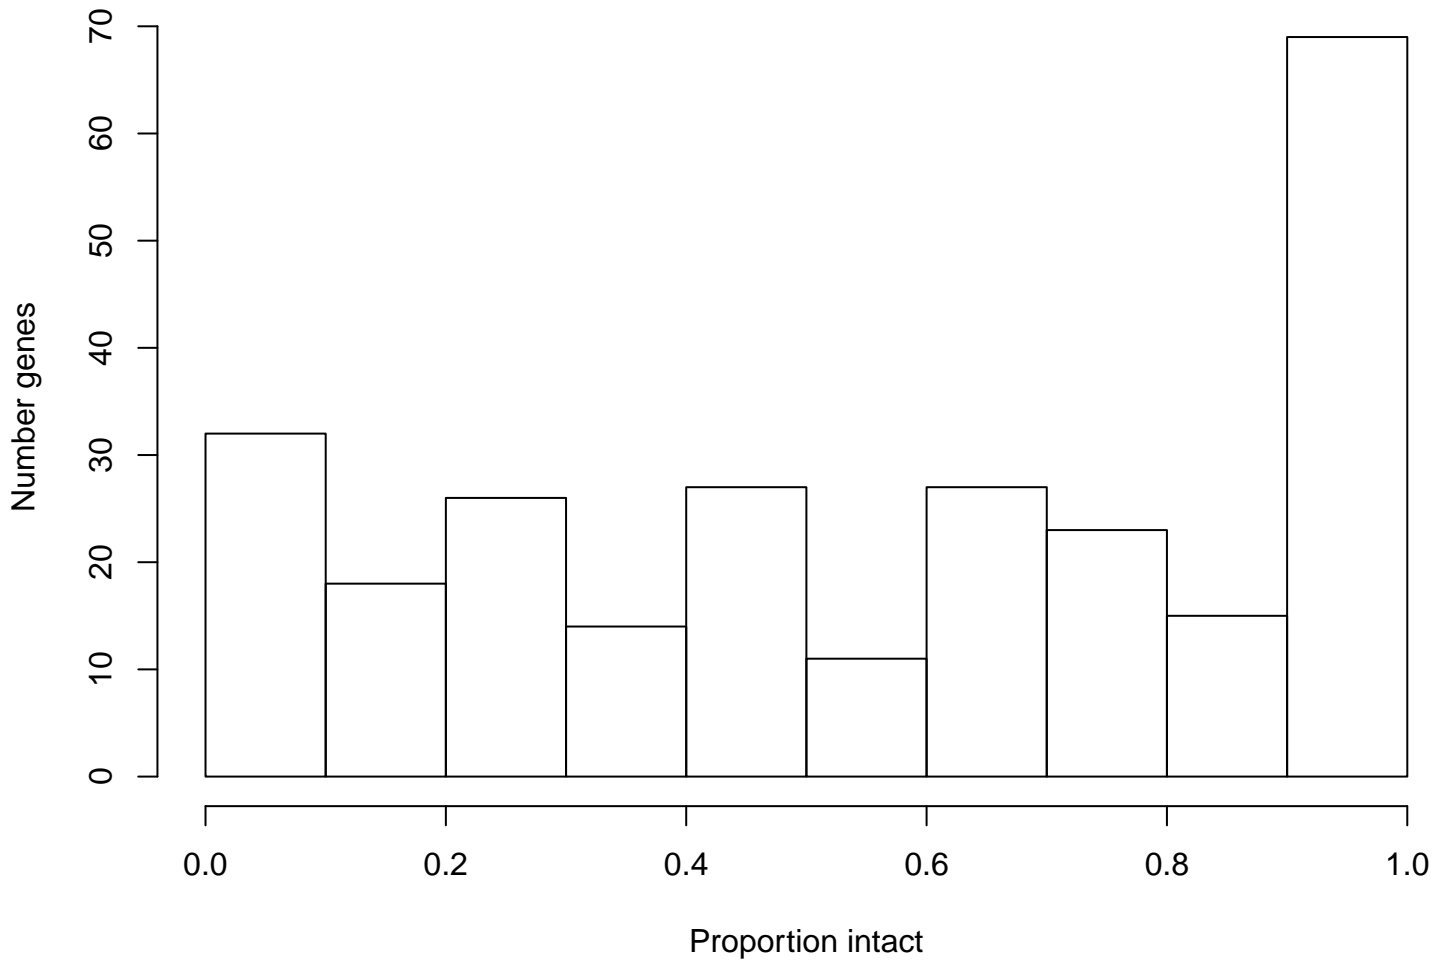

Supplement: NIHMS900499-supplement-335_2017_9704_MOESM3_ESM.pdf [file NIHMS900499-supplement-335_2017_9704_MOESM3_ESM.pdf]

# Supplementary Figure 4

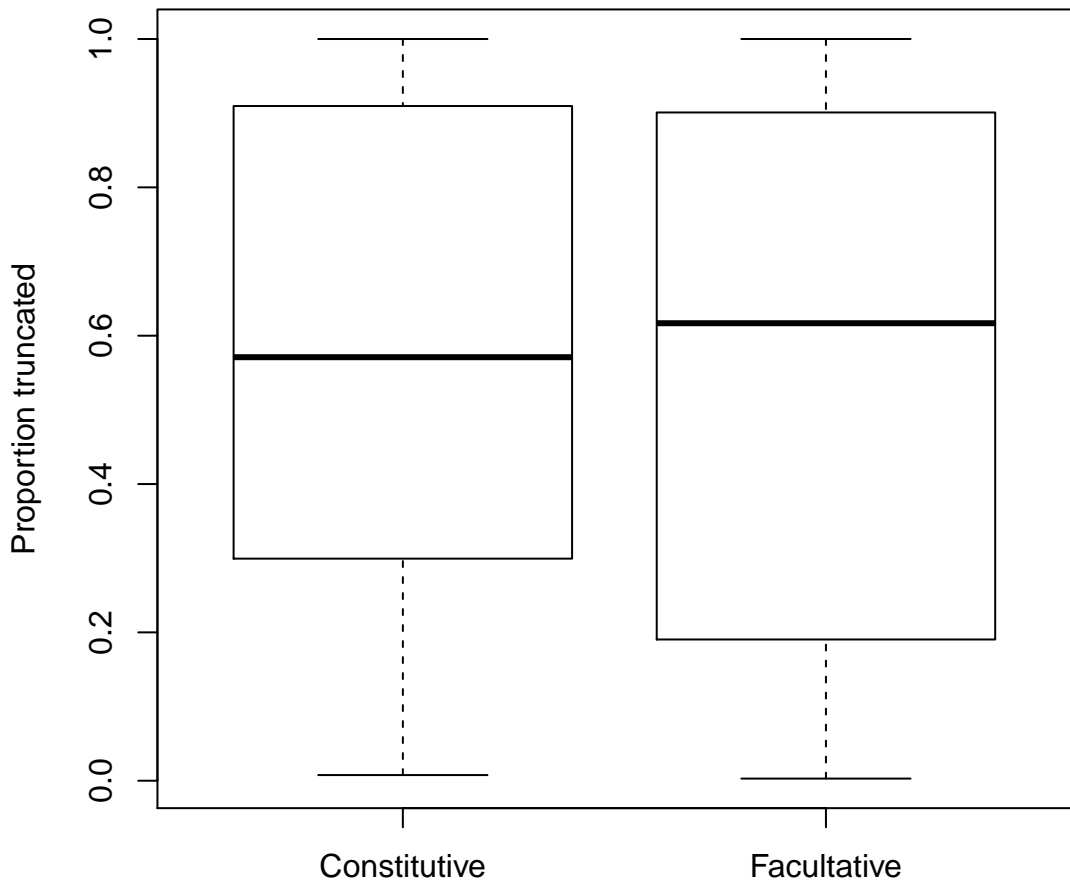

Supplement: NIHMS900499-supplement-335_2017_9704_MOESM4_ESM.pdf [file NIHMS900499-supplement-335_2017_9704_MOESM4_ESM.pdf]

Supplementary Figure 5

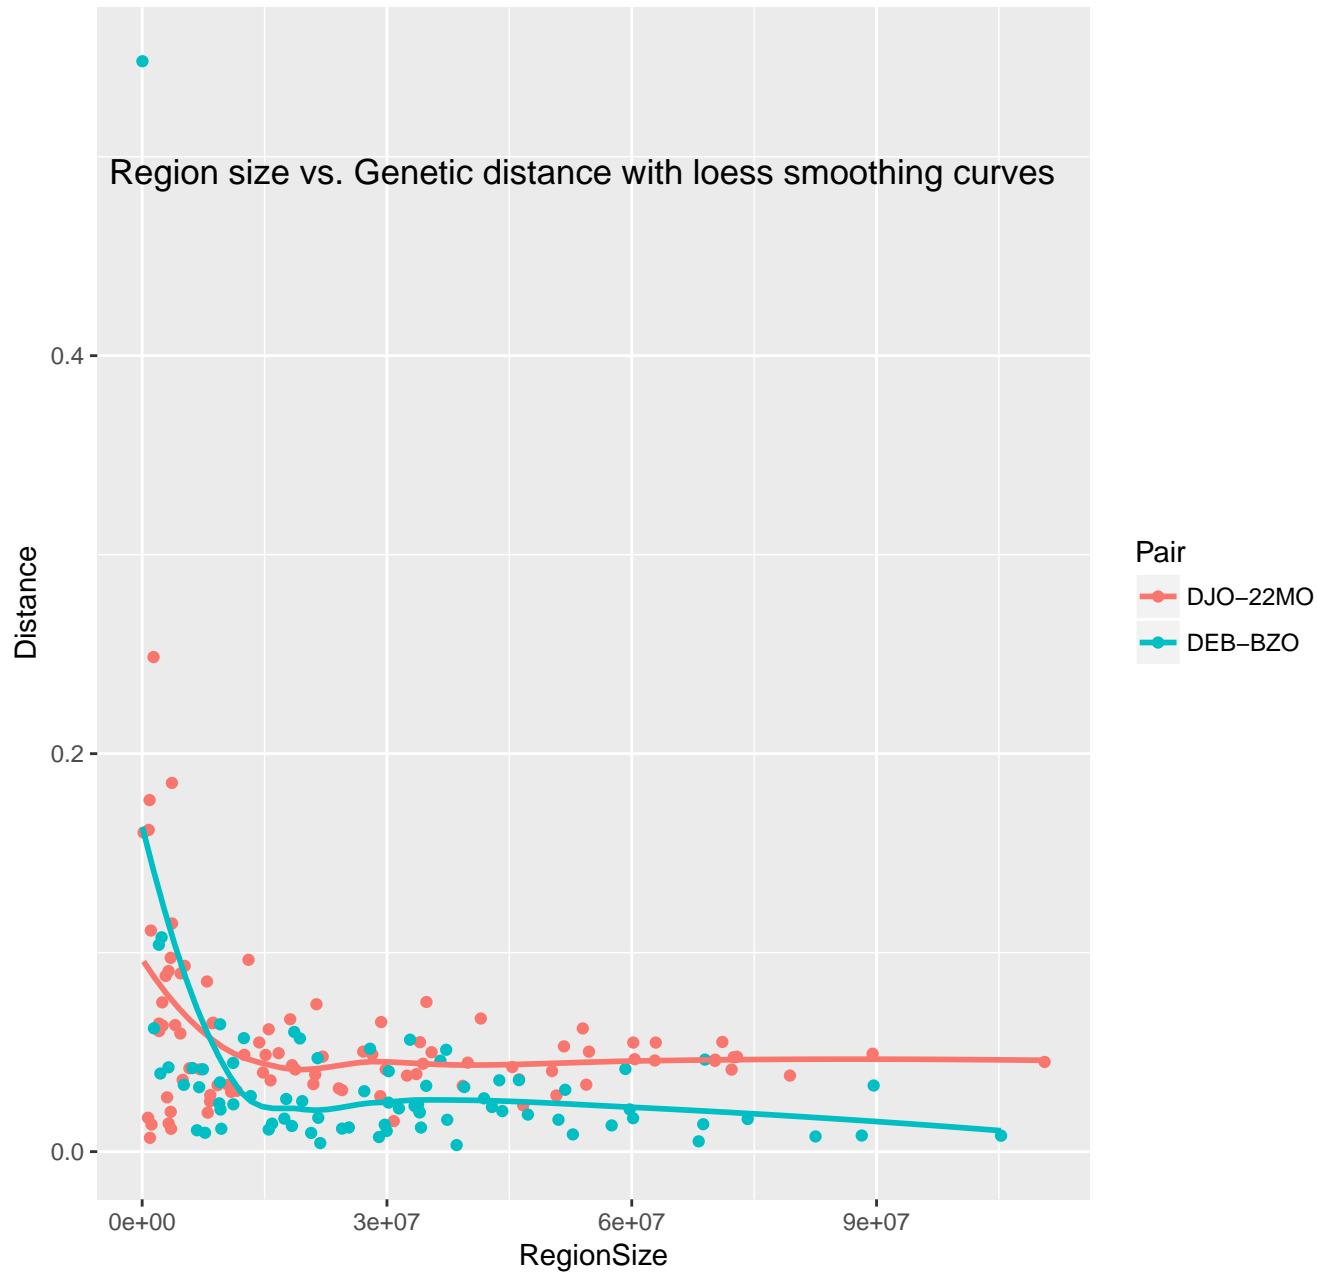

Supplement: NIHMS900499-supplement-335_2017_9704_MOESM5_ESM.pdf [file NIHMS900499-supplement-335_2017_9704_MOESM5_ESM.pdf]
